# Supplementary material for: A hollow tetrahedral cage of hexadecagold dianion provides a robust backbone for a tuneable sub-nanometer oxidation and reduction agent via endohedral doping
Source: Royal Society of Chemistry journal article supplement (doi:10.1039/b612221c), 2006-01-01
Supplement: b612221c.pdf [file b612221c.pdf]

## SUPPORTING INFORMATION

*Michael Walter and Hannu Häkkinen: A hollow tetrahedral cage of hexadecagold dianion provides a robust backbone for a tunable sub-nanometer oxidation and reduction agent via endohedral doping*

**Local minima for Si@Au<sub>16</sub> and Al@Au<sub>16</sub>.** The images show geometries found for Si@Au<sub>16</sub>. Al@Au<sub>16</sub> has corresponding geometries but with slightly different bond lengths. The coordinates of these structures are available at: <http://nano.jyu.fi/groups/comps/GoldMine>. The table shows the relative energies (in eV) of the structures with respect to the off-center-doped ground state **1**.

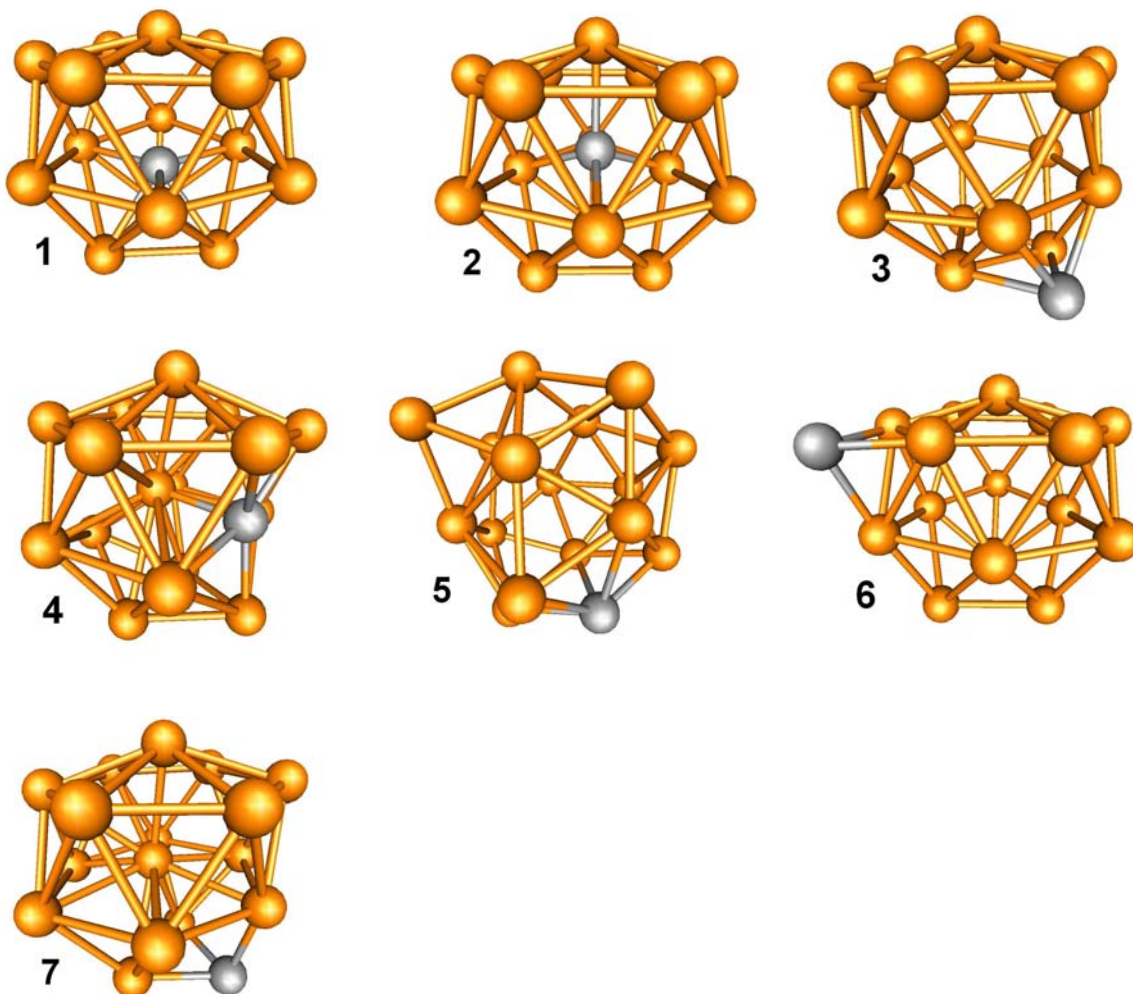

|                     | <b>1</b> | <b>2</b> | <b>3</b> | <b>4</b> | <b>5</b> | <b>6</b> | <b>7</b> |
|---------------------|----------|----------|----------|----------|----------|----------|----------|
| Si@Au <sub>16</sub> | 0        | 0.16     | 0.40     | 0.77     | 0.78     | 0.79     | 1.30     |
| Al@Au <sub>16</sub> | 0        | 0.03     | 0.66     | 1.03     | 0.50     | 1.21     | 1.02     |
